# Supplementary material for: Customer satisfaction of Vietnam Airline domestic service quality
Source: Springer Nature journal article supplement (doi:10.1186/s40887-017-0019-4), 2017-12-01
Supplement: MOESM1 [file 40887_2017_19_MOESM1_ESM.docx]

**Additional file 1: Variable measurement**

| Ký hiệu | **IN-FLIGHT SERVICES (INF)** |
| --- | --- |
| INF_1 | Meal variety |
| INF _2 | VNA has in-flight entertainment service (newspapers and magazines) |
| INF _3 | Cabin comfort |
| INF _4 | Availability of flight information |
| INF _5 | Friendliness of crew service |
| INF _6 | In-flight amenities |
|  | **FLIGHT CREW (FLI)** |
| FLI_1 | Experience of the pilots |
| FLI_2 | Employees’ speed handling request/ complaint |
| FLI_3 | Employees are professional |
| FLI_4 | Employee’s willingness to help |
|  | **BOARDING/DEPLANING/BAGGAGE (BDB)** |
| BDB_1 | On-time performance |
| BDB_2 | Handling of delayed flight |
| BDB_3 | Availability of flight information |
| BDB_4 | Waiting rooms are comfortable |
| BDB_5 | Availability of guiding information |
| BDB_6 | Efficient check in / baggage handling services |
| BDB_7 | Assurance of the baggage |
|  | **AIRCRAFT (AIR)** |
| AIR_1 | VNA has contemporary fleets |
| AIR_2 | The aircraft has clean and comfortable seats |
| AIR_3 | Safety records |
|  | **RESERVATION (RES)** |
| RES_1 | Ease of reservation/ticketing |
| RES_2 | Ticket distribution is comfortable |
| RES_3 | Quick response to the passengers’ reservation change |
| RES_4 | Friendly ticketing employees |
| RES_5 | Aircraft seats are available for ticketing passengers |
|  | **CHECK-IN (CHE)** |
| CHE _1 | Correctness of the check-in employees |
| CHE _2 | Courtesy of VNA check-in employees |
| CHE_3 | Check-in employees pay individual attention to passengers |
|  | **SATISFACTION OF SERVICE QUALITY (SAT)** |
| SAT_1 | My choice to use VNA was wise one |
| SAT_2 | I think that I did the right thing when I decided to use VNA |
| SAT_3 | VNA values customer’s comments |
