# Supplementary figures and images for: Customer satisfaction of Vietnam Airline domestic service quality
Source: Springer Nature journal article supplement (doi:10.1186/s40887-017-0019-4), 2017-12-01

**Additional file 2: Regression assumption test**


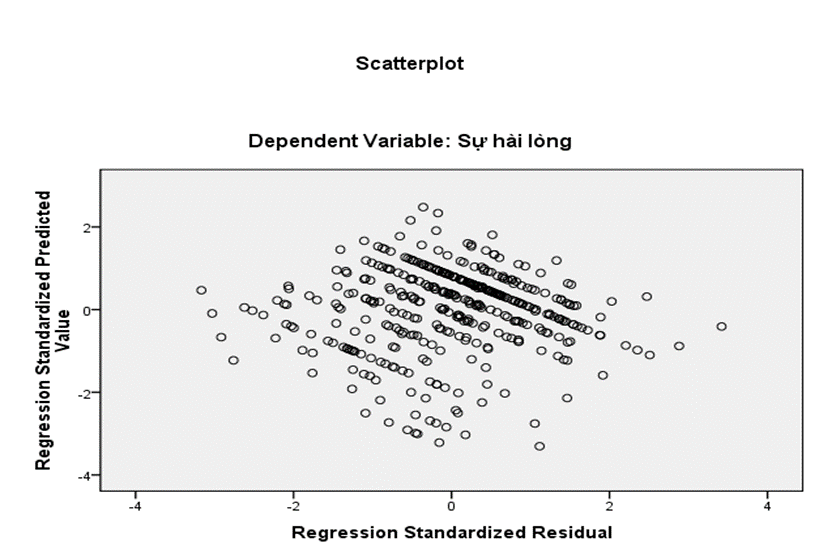


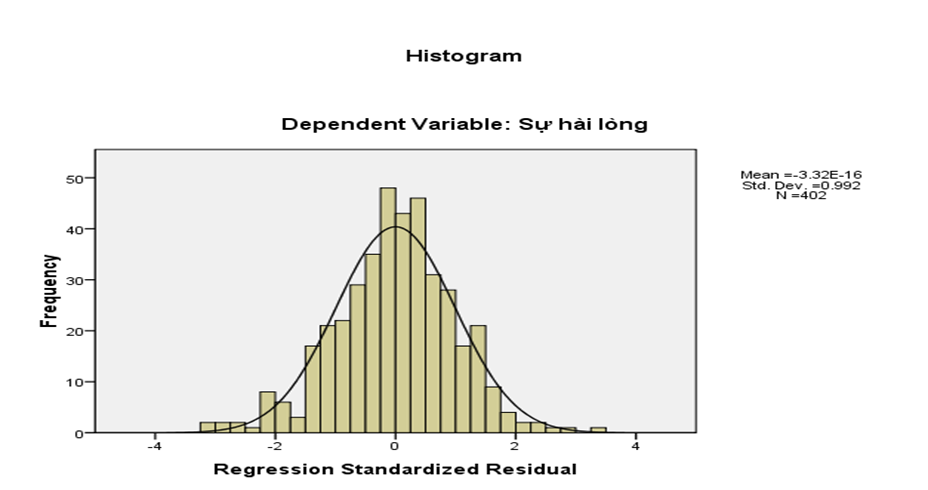


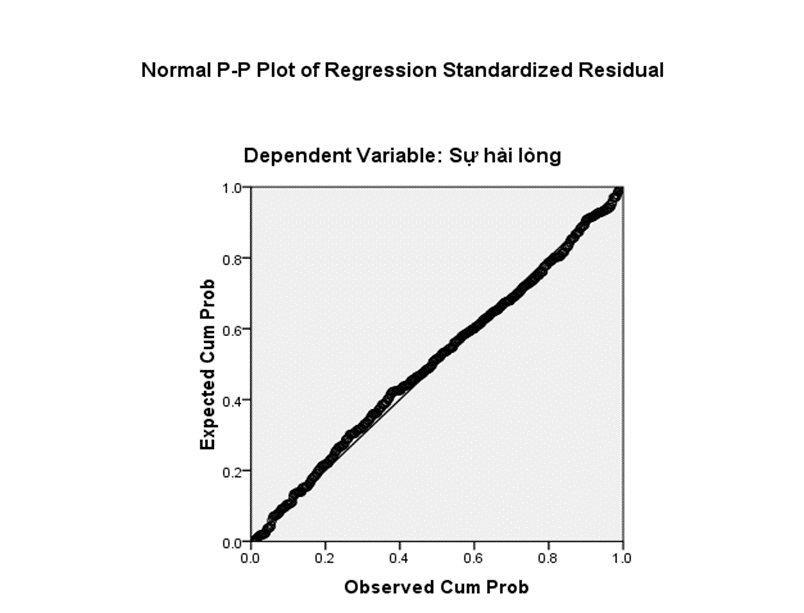

Supplement: MOESM2 [file 15282936]
